# Supplementary material for: c-MYC empowers transcription and productive splicing of the oncogenic splicing factor Sam68 in cancer
Source: PubMed Central journal article supplement — Nucleic Acids Res. 2019 May 8;47(12):6160–71. doi: 10.1093/nar/gkz344 (PMC6614821; doi:10.1093/nar/gkz344), 2019-05-08
Supplement: gkz344_supplemental_file.pdf [file gkz344_supplemental_file.pdf]

**c-MYC empowers transcription and productive splicing of the oncogenic splicing factor Sam68 in cancer**

Cinzia Caggiano<sup>1,5</sup>, Marco Pieraccioli<sup>1,5</sup>, Valentina Panzeri<sup>1,2</sup>, Claudio Sette<sup>1,3</sup> and Pamela Bielli<sup>1,4</sup>

<sup>1</sup>*Laboratory of Neuroembryology, Fondazione Santa Lucia IRCCS, Rome, Italy;*

<sup>2</sup>*Department of science medical/chirurgic and translational medicine, University of Rome Sapienza, Rome, Italy;*

<sup>3</sup>*Institute of Human Anatomy and Cell Biology, Catholic University of the Sacred Hearth, Rome, Italy;*

<sup>4</sup>*Department of Biomedicine and Prevention, University of Rome Tor Vergata, Rome, Italy.*

<sup>5</sup>These authors equally contributed to the work.

*SUPPLEMENTAL INFORMATION*

**A**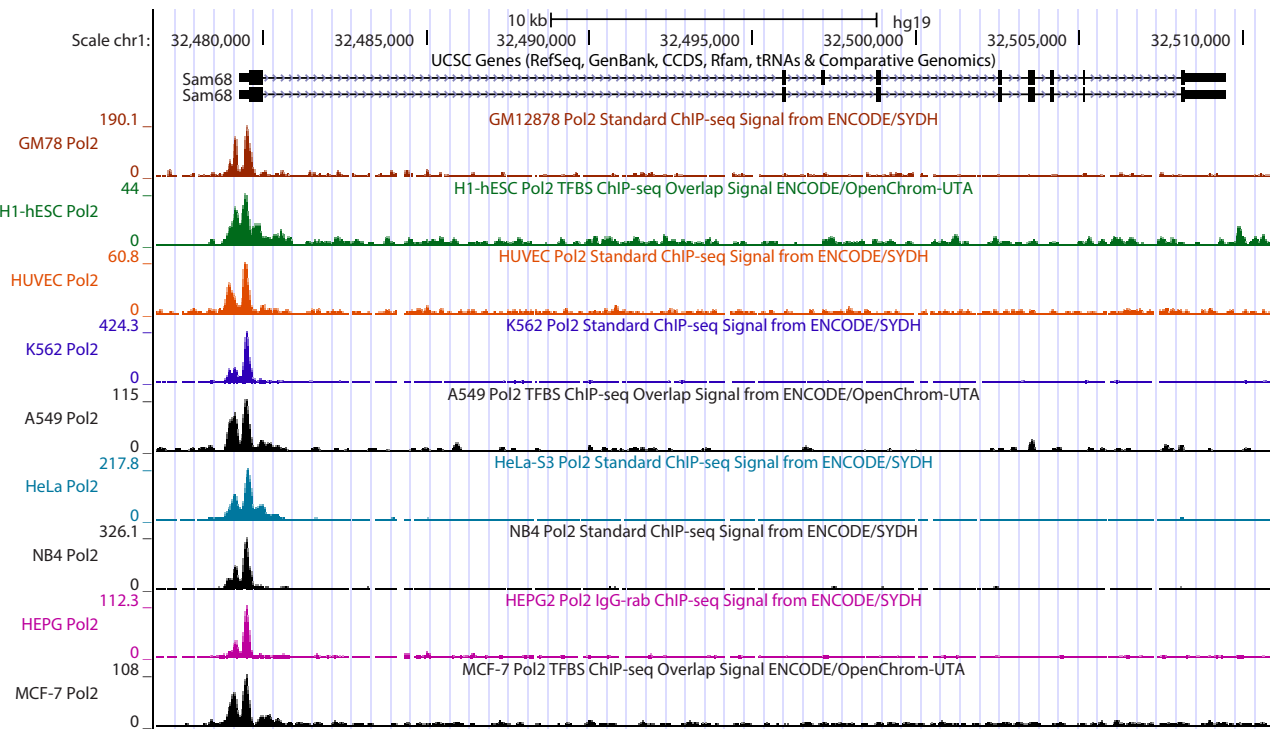**B**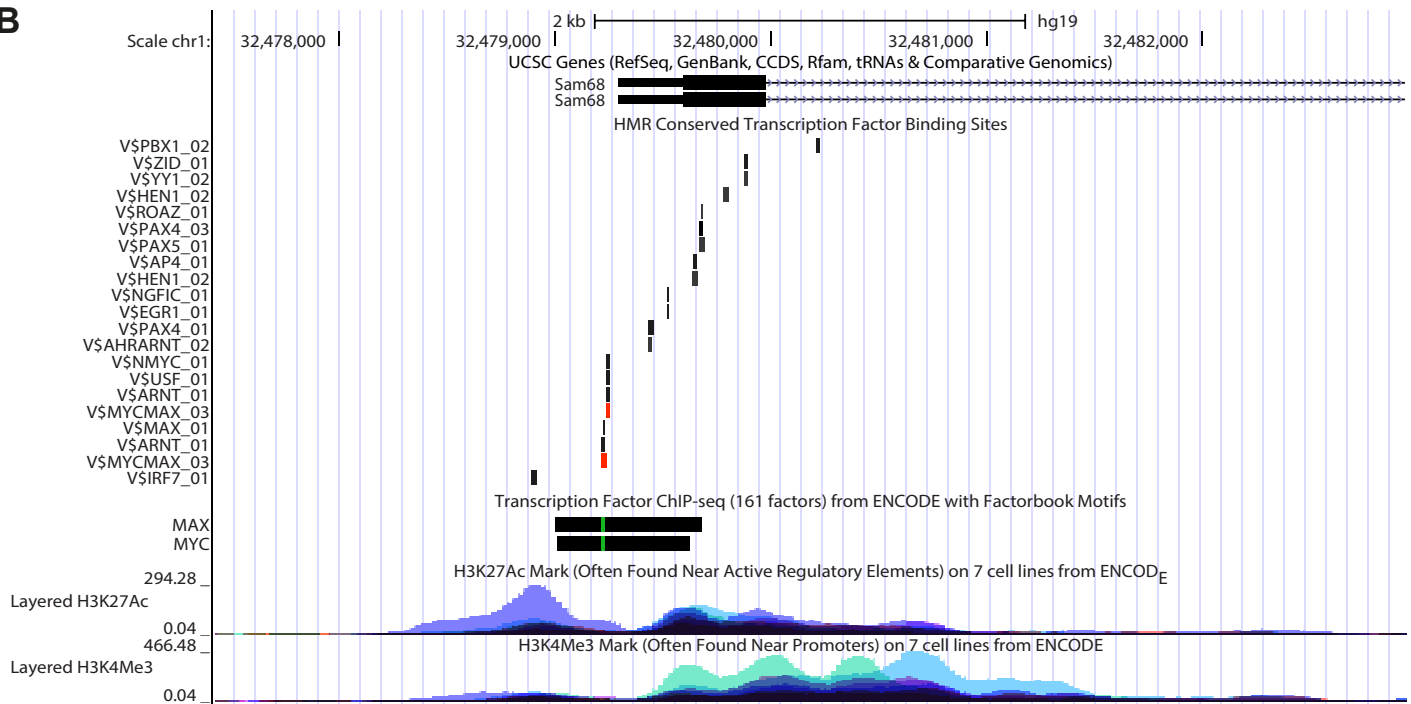**C**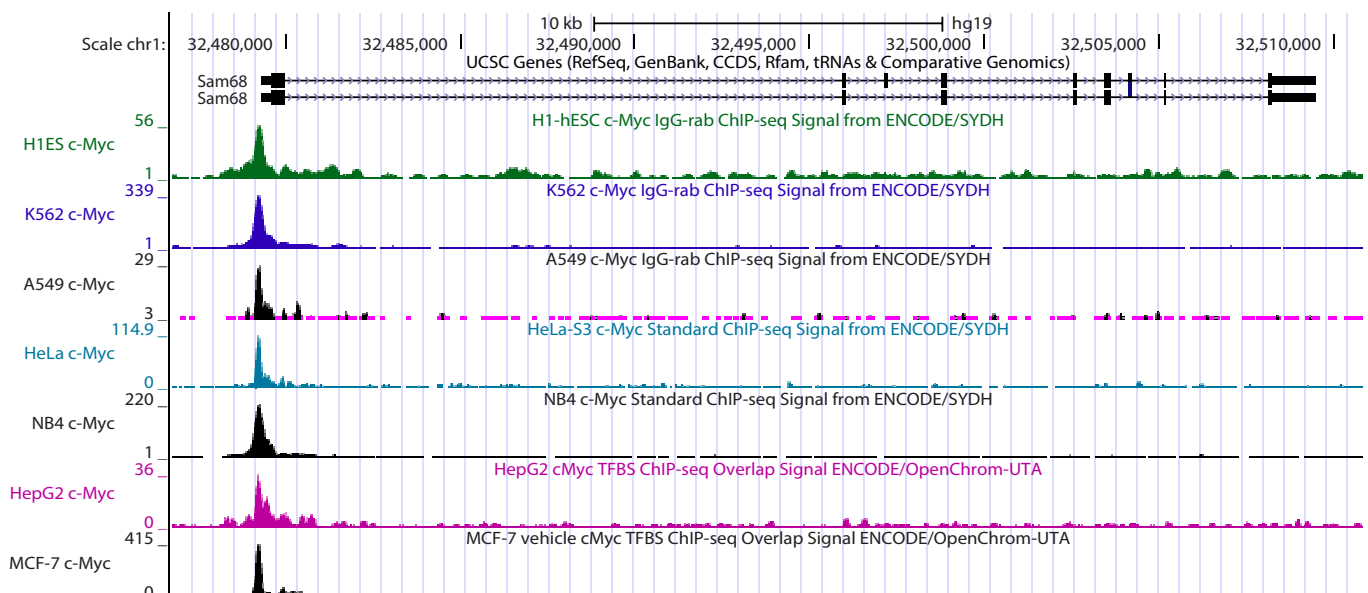



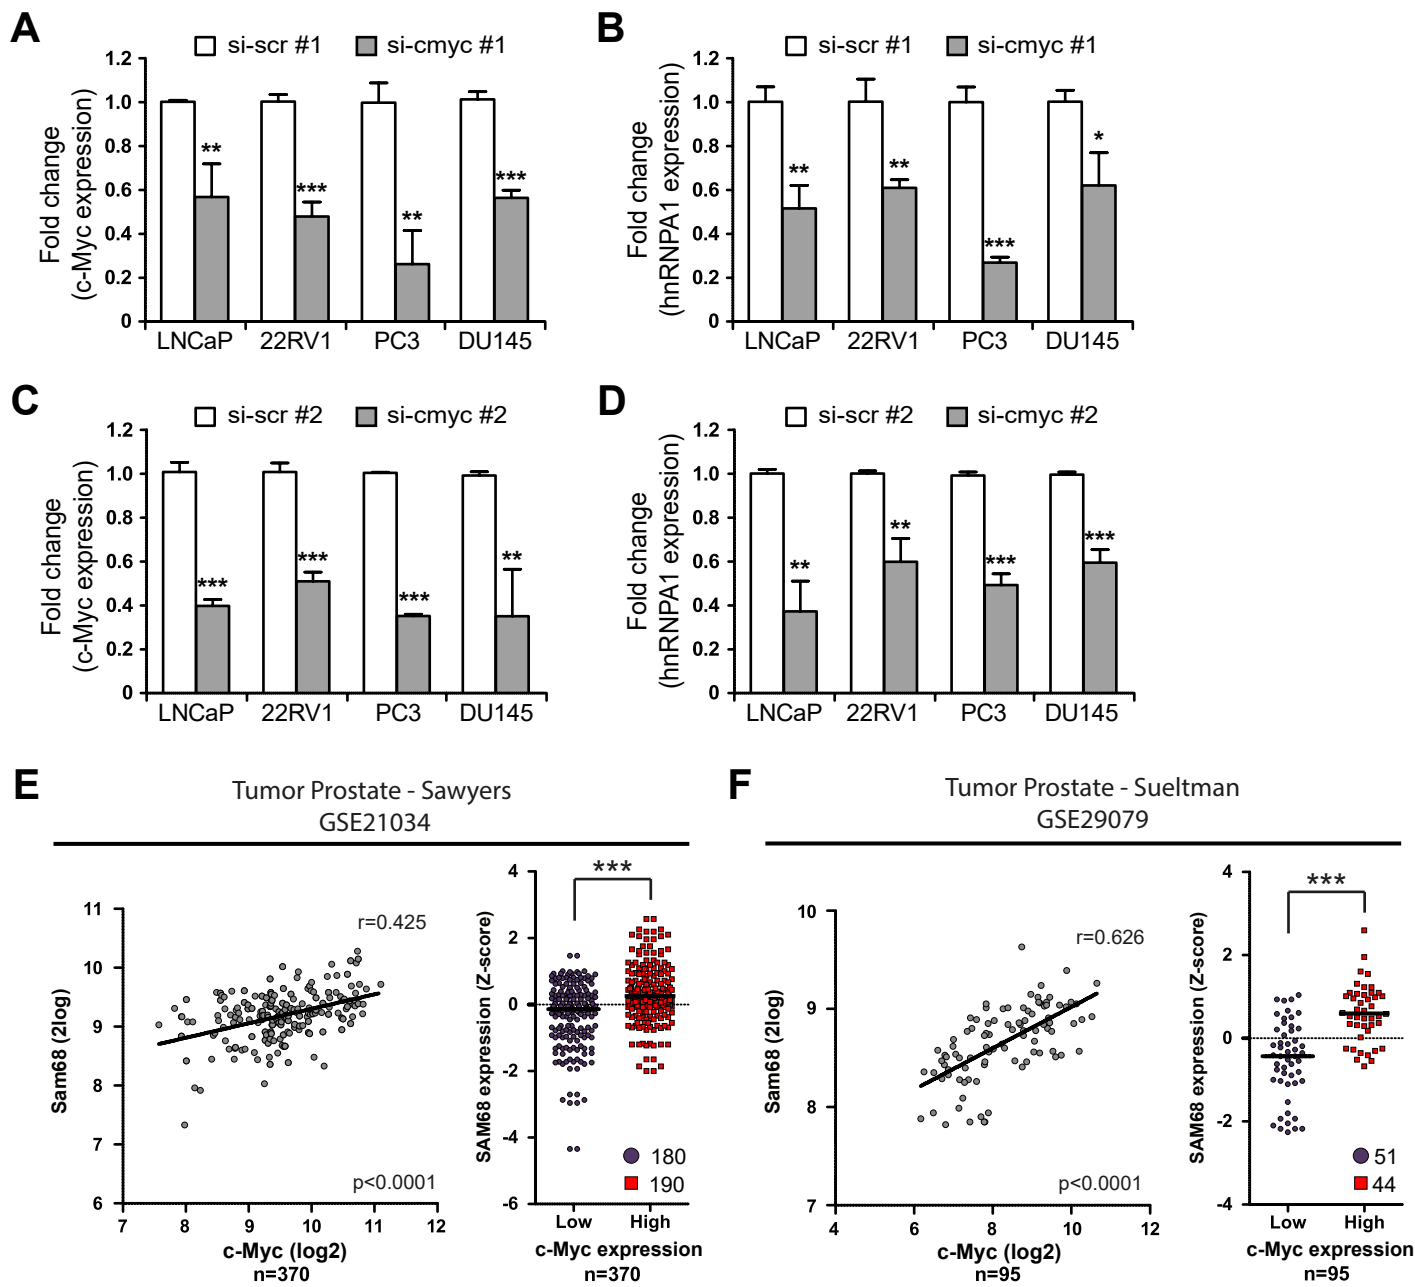

Supp Fig. 3



**A**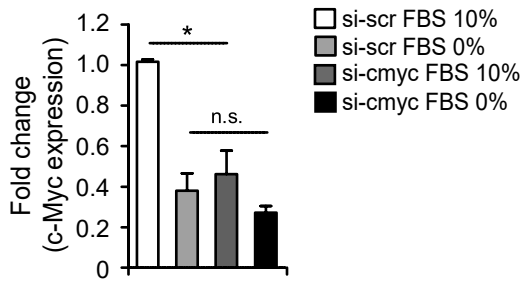**B**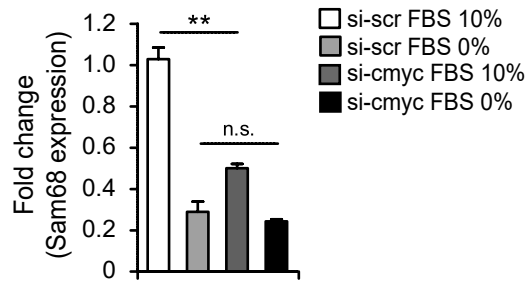**C**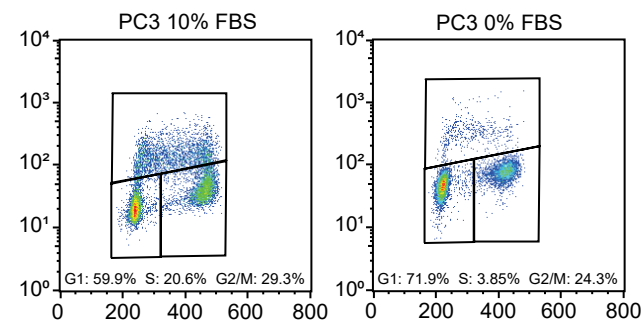**D**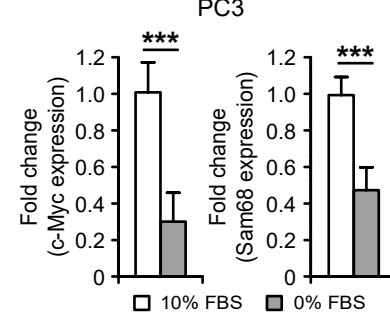**E**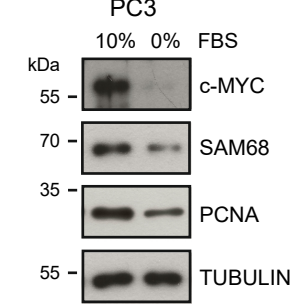**F**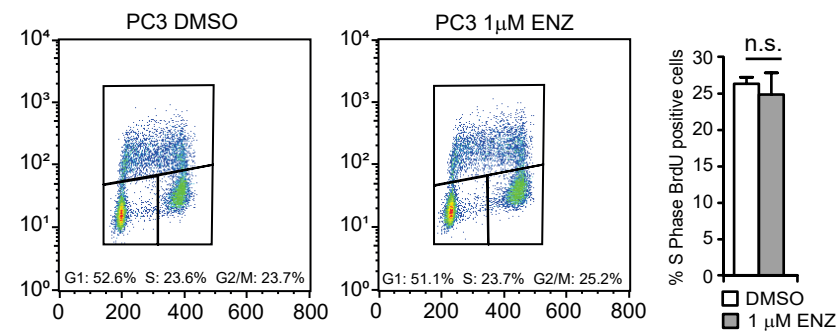**G**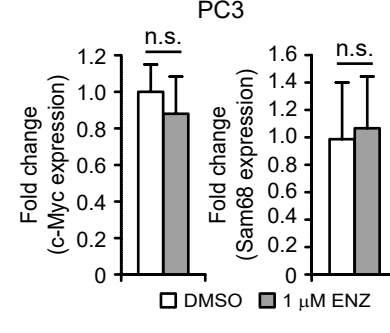**H**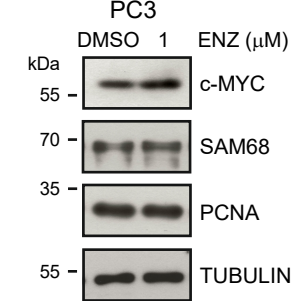

Supp Fig. 4

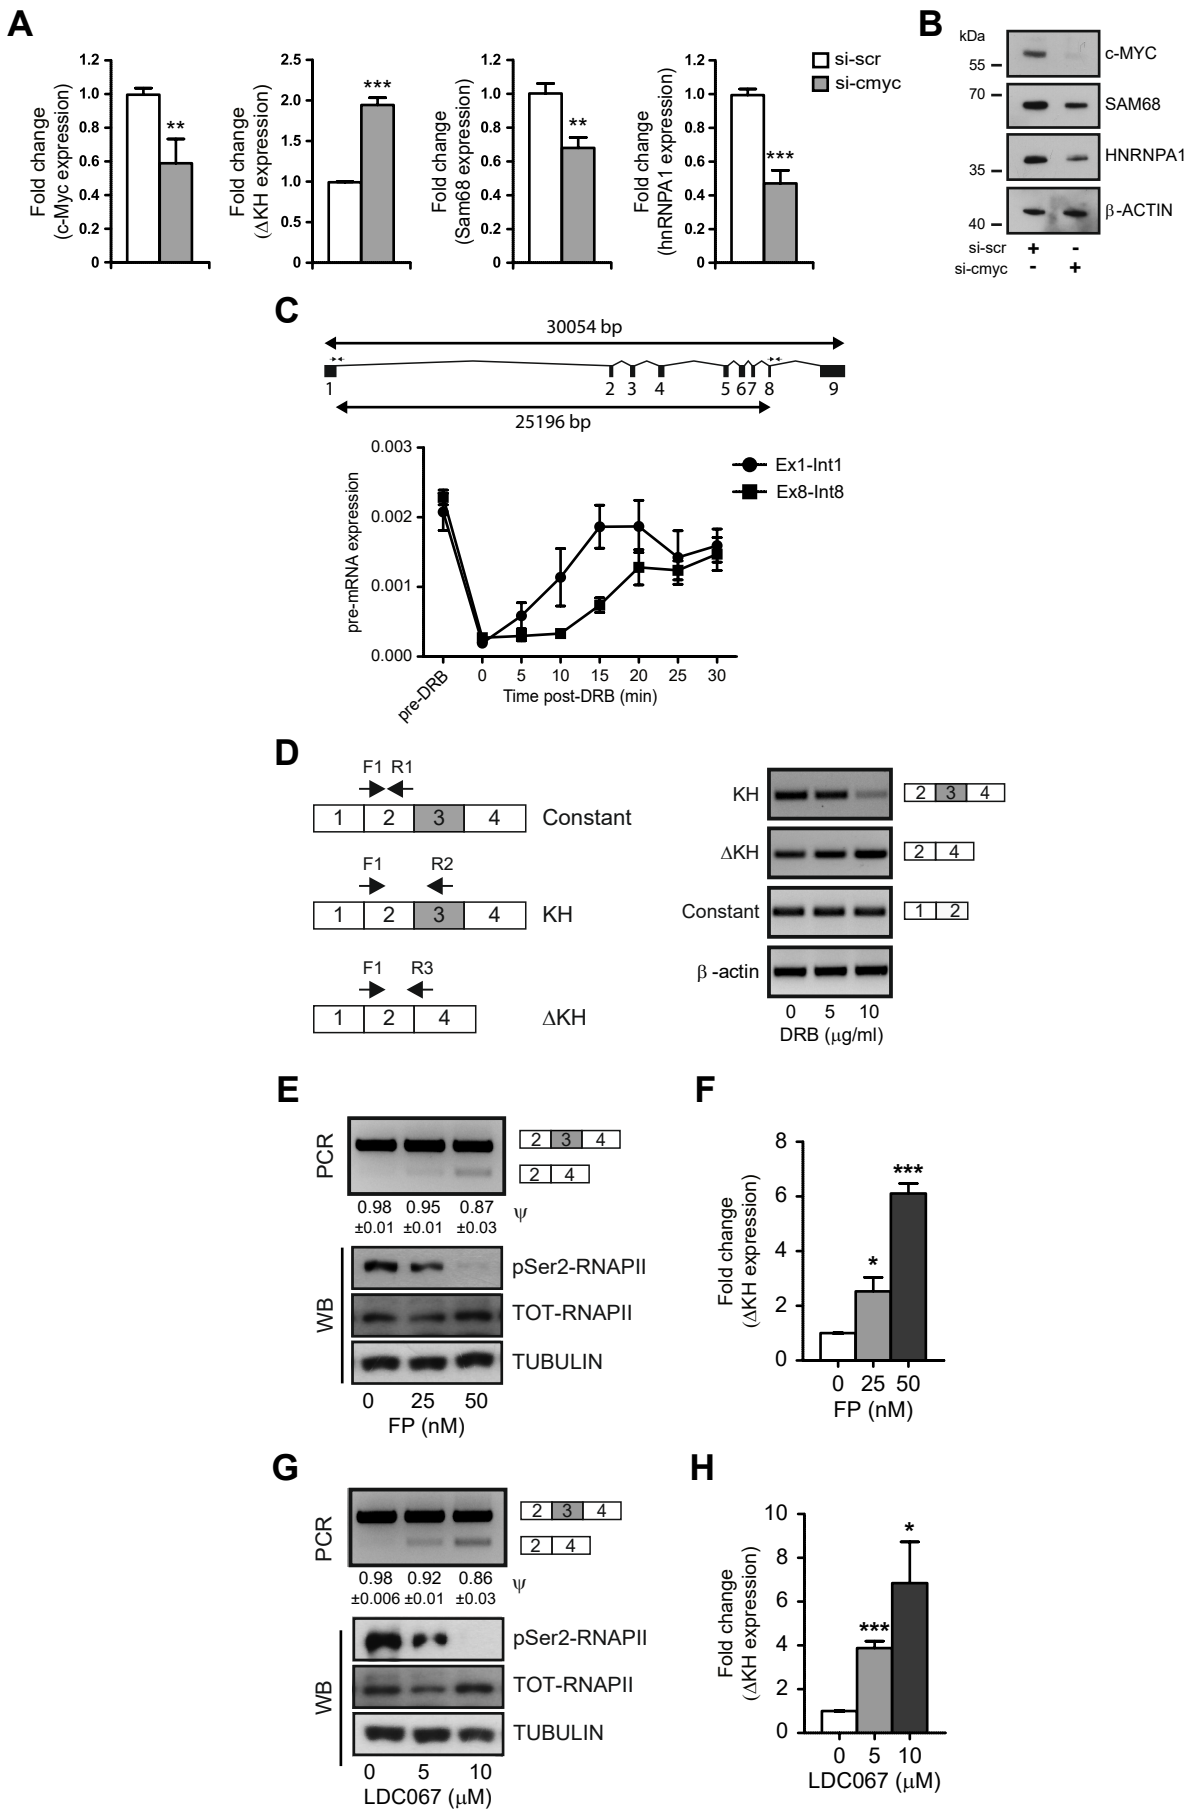

Supp Fig. 5

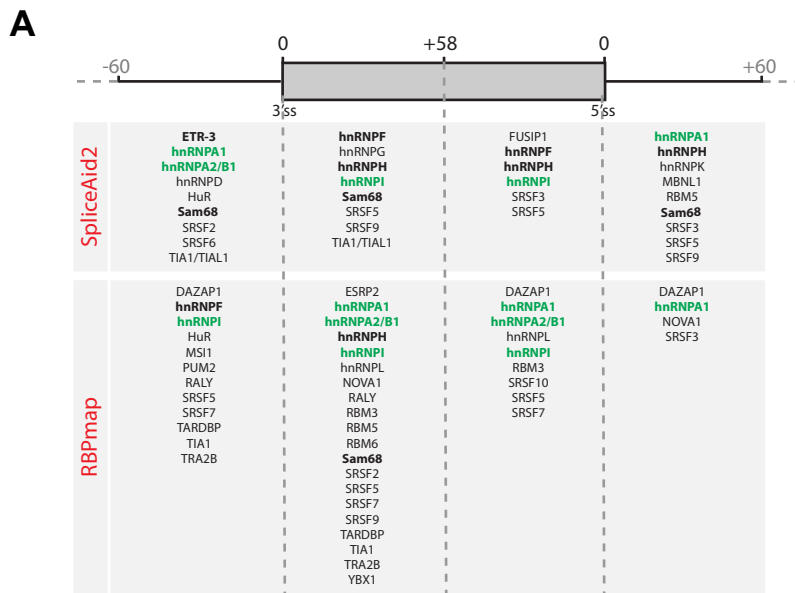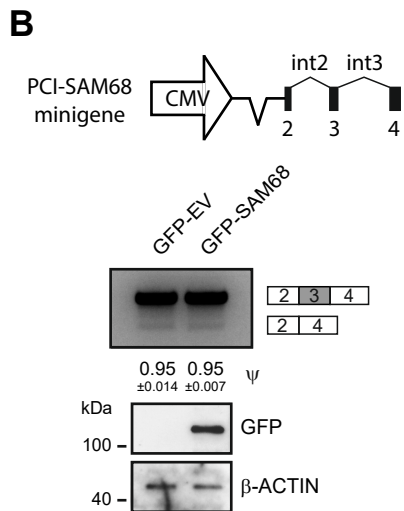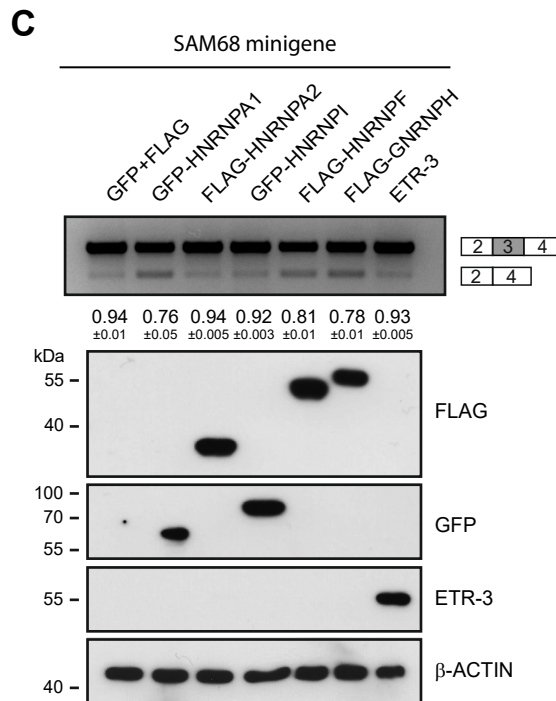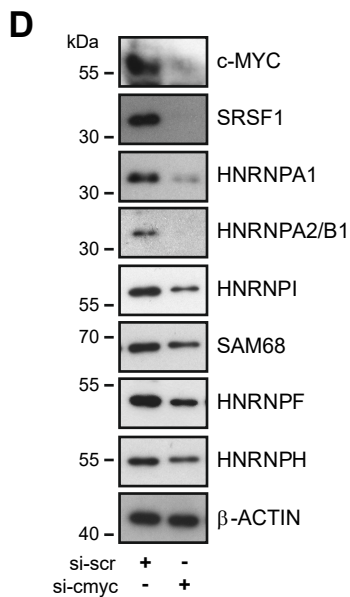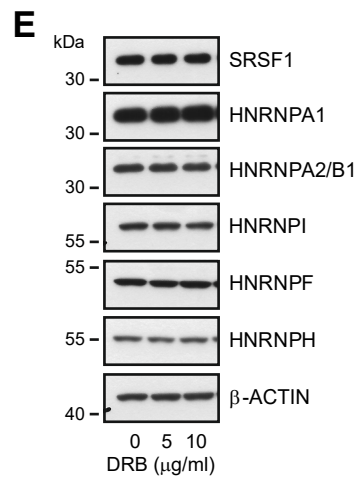

Supp Fig. 6

## Supplemental figure legends

**Figure S1. c-Myc binds Sam68 promoter region. Related to Figure 1.** A) UCSC Genome Browser snapshot of publicly accessible RNAPII ChIP-seq profiles of Sam68 gene locus including an intergenic region ~20 Kbp upstream of 5' end from indicated human cell lines. B) UCSC Genome Browser snapshot of publicly accessible putative binding sites for transcription factors on Sam68 promoter. Putative c-MYC and MAX binding sites are indicated in red. ChIP-seq profiles for MAX, c-MYC, H3K27Ac and H3K4Me3 on region between -2000/+2500bp from Sam68 TSS are also shown. C) UCSC Genome Browser snapshot of publicly accessible ChIP-seq profiles for c-MYC carried out on Sam68 locus in indicated cell lines. ChIP-seq control is omitted for visual clarity.

**Figure S2. c-MYC induces Sam68 expression. Related to Figure 2.** A) Diagram showing c-MYC canonical E-box sequences and their position on Sam68 promoter. TSS: transcription start site (arrow). B) Bar graphs represent luciferase assays performed in HEK293T cells transfected with Sam68 (*left graph*), or hnRNPA1 (*right graph*), promoter reporter vector in combination (c-MYC), or not (EV: empty vector), with c-MYC-pCDNA3 plasmid. Luciferase assays were carried out at the indicated time points. A scheme of Sam68 and hnRNPA1 human promoter (*top schemes*) and representative Western blots showing c-MYC overexpression are also shown (*bottom panels*). C) Representative Western blot analysis showing c-MYC overexpression relative to Figure 2C. D) Bar graph represents luciferase assay performed in HEK293T cells transfected with Sam68 promoter reporter vector in presence of indicated plasmids (EV: empty vector; c-MYC: c-MYC-pCDNA3 vector; MAX: MAX-pCDNA3 vector). Luciferase assay was carried out 24 hours post-transfection. A representative Western blot analysis of c-MYC and MAX overexpression is also shown (*right panel*). B,C,D)  $\beta$ -actin has been used as loading control in western blot analyses. B,D) Bars represent mean  $\pm$  SD of three biological replicates measured each in triplicate. \*P < 0.05, \*\*P < 0.01, \*\*\*P < 0.001; n.s., not significant (Student's t-test).

**Figure S3. c-MYC regulates Sam68 expression in PCa. Related to Figure 3.** A-D) Bar graphs show qPCR analyses of c-Myc (c-Myc; A,C) and hnRNPA1 (hnRNPA1; B,D) expression analysed in PC3 cell line transfected with two different pools of c-Myc (si-cmyc #1 and si-cmyc #2) or control (si-scr #1 and si-scr #2) siRNAs (A-D). Fold change of c-Myc and hnRNPA1 expression relative to Histone 3 expression was calculated by  $\Delta\Delta Cq$  method. Bars represent mean  $\pm$  SD of three biological replicates. \*P < 0.05, \*\*P < 0.01, \*\*\*P < 0.001 (Student's t-test). E,F) Pearson's correlation between Sam68 and MYC expression (E,F *left panels*) and Sam68 expression in c-MYC<sup>low</sup> (blue circles) and c-MYC<sup>high</sup> (red squares) patient groups (E,F *right panels*) retrieved from GSE21034-Sawyers (E) and GSE29079-Sueltman (F) datasets. Pearson's correlation coefficient (r) and p-value of the correlation were reported. In right panels statistical significance was calculated by Mann-Whitney test \*\*\* p < 0.001.

**Figure S4. Down-regulation of c-MYC and Sam68 expression upon cell growth arrest. Related to Figure 4.** A,B) Bar graphs show qPCR analyses of c-MYC (A) and Sam68 (B) expression analysed in LNCaP cell line transfected with c-MYC (si-cmyc) or control (si-scr) siRNAs (A,B) and grown

for 3 days in control (FBS 10%) and serum deprivation (FBS 0%) condition. Fold change of c-Myc and Sam68 expression relative to Histone 3 expression was calculated by  $\Delta\Delta Cq$  method. C-H) Representative dot plot profiles of cytometric analyses showing DNA content versus BrdU incorporation in PC3 cells after 6 days of serum deprivation (C) or 1  $\mu M$  Enzalutamide (F) conditions. Bar graphs represent the percentage of S-phase BrdU positive cells after 6 days of treatment. qPCR (D,G) and Western blot (E,H) analyses of c-MYC and Sam68 expression are also shown. Fold change of c-Myc and Sam68 expression relative to Histone 3 expression was calculated by  $\Delta\Delta Cq$  method. A-H) Bars represent mean  $\pm$  SD of three biological replicates. \*P < 0.05, \*\*P < 0.01, \*\*\*P < 0.001, n.s., not significant (Student's t-test).

**Figure S5. c-MYC regulates alternative splicing of Sam68. Related to Figure 5.** A,B) qPCR (A) and representative Western blot (B) analyses showing c-MYC, Sam68-DKH, Sam68 and hnRNPA1 expression related to Figure 5E. In A, fold change of c-MYC, Sam68 and hnRNPA1 expression is relative to Histone 3 expression, while fold change of Sam68- $\Delta KH$  expression is relative to Sam68-KH expression. Fold change was calculated by  $\Delta\Delta Cq$  method. Each value represents the mean  $\pm$  SD from three independent experiments. P values of Student's t-test are reported, \*\*P < 0.01, \*\*\*P < 0.001. C) Scheme of Sam68 gene and primers position (*upper scheme*) used for quantitative evaluation (qPCR) of Sam68 exon1-intron1 and exon8-intron8 expression at indicated time point post-DRB release (*lower graph*). D) sqPCR shows *in vivo* splicing assay performed in LNCaP cells treated for 12 hours with suboptimal DRB concentration. A scheme of primer position used to amplify Sam68 isoforms is shown (*right scheme*). E-H) sqPCR (E,G) and qPCR (F,H) analyses showing the Sam68-  $\Delta KH$  and KH ratio in LNCaP cells treated for 12 hours with suboptimal Flavopiridol (FP) (E,F) and LDC067 (LDC067) (G,H) concentration. Representative western blot (WB) analysis performed to evaluate Serine 2 phosphorylation (pSer2-RNAPII) and total (TOT-RNAPII) RNAPII expression is also shown (E,G). Tubulin has been used as loading control.

**Figure S6. hnRNP F modulates alternative splicing of Sam68. Related to Figure 6.** A) Schematic representation of *in silico* analyses performed using SpliceAid2 and RBPmap prediction tools to identified putative splicing factor binding sites on Exon 3 of Sam68 RNA. Analysed region includes the last 60bps of intron 2 (black line), sequence of exon 3 (grey box), and the first 60bps of intron 3 (black line). The binding sites position of the most recurrent splicing factors identified and of ETR-3 (black bold), and splicing factors target of c-MYC (green bold) are indicated. B,C) sqPCR analyses of *in vivo* splicing assay of Sam68 minigene performed in HEK293T transfected with GFP-SAM68 (B) or with splicing factors identified in A (C). GFP (GFP) and FLAG (FLAG) empty vectors have been transfected as control plasmids. Representative western blot analysis performed to evaluate the expression of transfected splicing factors is also shown (B,C, *lower panel*). A scheme of Sam68 minigene (B, *upper scheme*) and the Percent of Spliced-In Index (PSI;  $\psi$ ) are also reported (B,C). D,E) Western blot analyses performed to evaluate the expression of the indicated splicing factors in LNCaP cells depleted (si-cmyc) or not (si-scr) for c-Myc (D) or cultured for 12 hours in presence of suboptimal doses of DRB (E).

### Supplementary Table S1.

List of oligonucleotides used in this study.

| <b>Oligonucleotides used for sq- and q-PCR analyses of ChIP and CLIP experiments</b> |                                    |
|--------------------------------------------------------------------------------------|------------------------------------|
| Name                                                                                 | Sequence (5' to 3')                |
| <i>human ChIP Sam68 promoter MYCBS F</i>                                             | GCAGACAAAGACATTCCACAGC             |
| <i>human ChIP Sam68 promoter MYCBS R</i>                                             | CCAGAGCTTGATGCGCATG                |
| <i>human ChIP hnRNPA1 promoter MYCBS F</i>                                           | GGTTCACTGCCTACTCCTGCC              |
| <i>human ChIP hnRNPA1 promoter MYCBS R</i>                                           | AGTCGCTTGCAAAGCATGA                |
| <i>human ChIP CyclinB1 promoter MYCBS F</i>                                          | CTCTCCAGGTGGCCGCTGCAGCTG           |
| <i>human ChIP CyclinB1 promoter MYCBS R</i>                                          | CGGCTGCCGGTTCGCAGAGAATGC           |
| <i>human ChIP Nucleolin promoter MYCBS F</i>                                         | GCGGGAAAGACAGAGTCACTGAG            |
| <i>human ChIP Nucleolin promoter MYCBS R</i>                                         | TCCCTCTGGAGATTCCAGGACC             |
| <i>human ChIP 16q22 F</i>                                                            | CTACTCACTTATCCATCCAGGCTAC          |
| <i>human ChIP 16q22 R</i>                                                            | ATTCACACACTCAGACATCACAG            |
| <i>human CLIP Sam68 ex3 F</i>                                                        | GCAGGAAGAGACTGGTGCAA               |
| <i>human CLIP Sam68 int3 R</i>                                                       | TTCTGGGCAAGTAGAAGGCA               |
| <b>Oligonucleotides used for cloning and mutagenesis</b>                             |                                    |
| Name                                                                                 | Sequence (5' to 3')                |
| <i>human intergenic F MluI</i>                                                       | TCTAACGCGTTTTTCGGCATTTCACAGAGATGT  |
| <i>human intergenic R XhoI</i>                                                       | CAGGCTCGAGCATGCCAGTCTCTTTGTAAGCC   |
| <i>human Sam68 promoter F MluI</i>                                                   | TCTAACGCGTGTGTTCCCTGATGTCTGGGACC   |
| <i>human Sam68 promoter R XhoI</i>                                                   | CAGGCTCGAGGGATGTGCGATCCAAGGAGCG    |
| <i>human hnRNPA1 promoter F MluI</i>                                                 | TCTAACGCGTGCATGCGCAAAGCTAGGACAAAC  |
| <i>human hnRNPA1 promoter R XhoI</i>                                                 | CAGGCTCGAGACTCGCTCACCAAGGCAAGG     |
| <i>human Sam68 promoter mut5A F MluI</i>                                             | TCTAACGCGTCTCAATTTCTCCCTCCAGGTTTCC |
| <i>human Sam68 promoter mut5B F MluI</i>                                             | TCTAACGCGTGACCCTCTCGGCAGTCTTTACTTC |
| <i>human Sam68 promoter mut5C F MluI</i>                                             | TCTAACGCGTGAGAAACCCAAGGGCGGTGC     |
| <i>human Sam68 promoter mut3A F XhoI</i>                                             | CAGGCTCGAGGCACCGCCCTTGGGTTTCTC     |
| <i>human Sam68 promoter mut3B F XhoI</i>                                             | CAGG CTCGAG GCCAGAGCTTGATGCGCATG   |
| <i>human Sam68 promoter mut1 F</i>                                                   | AAGGGGAGGAGAAAAGTATTCGCTAGCGC      |
| <i>human Sam68 promoter mut1 R</i>                                                   | GCGCTAGCGGAATACTTTTCTCCTCCCCTT     |
| <i>human Sam68 promoter mut2 F</i>                                                   | CTAGCGCCGAGTAAAGTTGAAAACGAAACG     |
| <i>human Sam68 promoter mut2 R</i>                                                   | CGTTTCGTTTTCAACTTTACTCGGCGCTAG     |
| <i>human MAX F HindIII</i>                                                           | TCTAAAGCTTAGCGATAACGATGACATCGAG    |
| <i>human MAX R BamHI</i>                                                             | TCTAGGATCCTTAGCTGGCCTCCATCCGG      |
| <i>human Sam68 minigene ex2 F EcoRI</i>                                              | CGGAATTCAAATTGAGAAGATTCAGAAAGGAG   |
| <i>human Sam68 minigene ex4 R Sall</i>                                               | GCGTCGACCGGTACTAGAAATTTCTTG        |
| <b>Oligonucleotides used for sqPCR and qPCR</b>                                      |                                    |
| Name                                                                                 | Sequence (5' to 3')                |
| <i>human H3 F</i>                                                                    | GTGTCATCCATGCCAAACGG               |
| <i>human H3 R</i>                                                                    | GTGGCGAGATAGCCCTCCTA               |
| <i>human Sam68 F1</i>                                                                | TGACGGCAGAAATTGAGAAG               |
| <i>human Sam68 R1</i>                                                                | GACAGGTATCAGCACTCGCTC              |
| <i>human Sam68 R2</i>                                                                | CCAAGAATCTTCCCCACAAA               |
| <i>human Sam68 R3</i>                                                                | GCAGATCCATATTCAAGTGGG              |
| <i>human Myc F</i>                                                                   | AATGAAAAGGCCCCCAAGGTAGTTATCC       |
| <i>human Myc R</i>                                                                   | GTGTTTCCGCAACAAGTCTCTCTC           |
| <i>human hnRNPA1 F</i>                                                               | GCCCTGTCAAAGCAAGAGATGGCTAG         |
| <i>human hnRNPA1 R</i>                                                               | CGACCACTGAAAGTTTCTCCACGACCG        |
| <i>human Sam68 prox ex1 F</i>                                                        | CAGAGAACAAGTACCTGCCCG              |
| <i>human Sam68 prox int1 R</i>                                                       | CACGGGAGGCCCCCTTAC                 |
| <i>human Sam68 dist ex8-int8 F</i>                                                   | ATGGACATGGGGAGGTTCAAG              |

|                                |                             |
|--------------------------------|-----------------------------|
| <i>human Sam68 dist int8 R</i> | <i>CAGCATTCTCCCAGGCACTT</i> |
| <i>pCI F</i>                   | <i>GGTGTCCACTCCCAGTCAA</i>  |
